# Supplementary material for: Tachyarrhythmias During Hospitalization for COVID‐19 or Multisystem Inflammatory Syndrome in Children and Adolescents
Source: PubMed Central journal article supplement — J Am Heart Assoc. 2022 Oct 17;11(20):e025915. doi: 10.1161/JAHA.122.025915 (PMC9673680; doi:10.1161/jaha.122.025915), 2022-10-17
Supplement: JAH3-11-e025915-s001.pdf [file JAH3-11-e025915-s001.pdf]

# **SUPPLEMENTAL MATERIAL**

## OVERCOMING COVID-19 INVESTIGATORS

**Alabama:** Children's of Alabama, Birmingham. Michele Kong, MD.

**Arizona:** University of Arizona, Tucson. Mary Glas Gaspers, MD; Katri V. Typpo, MD.

**Arkansas:** Arkansas Children's Hospital, Little Rock. Ronald C. Sanders Jr., MD, MS; Katherine Irby, MD; Peter Mourani, MD.

**California:** Children's Hospital of Orange County, Orange County. Adam J. Schwarz, MD.

**California:** Miller Children's & Women's Hospital Long Beach, Long Beach. Christopher J. Babbitt, MD.

**California:** Rady Children's Hospital, San Diego. Helen Harvey, MD, MS.

**California:** UCSF Benioff Children's Hospital Oakland, Oakland. Natalie Z. Cvijanovich, MD.

**California:** UCSF Benioff Children's Hospital, San Francisco. Matt S. Zinter, MD.

**Colorado:** Children's Hospital Colorado, Aurora. Aline B. Maddux, MD, MSCS; Christina M. Osborne, MD; Sara Shankman, DNP, CPNC-AC.

**Connecticut:** Connecticut Children's, Hartford. Christopher L. Carroll, MD, MS.

**Connecticut:** Yale New-Haven Children's Hospital, New Haven. John S. Giuliano, Jr., MD.

**Florida:** Holtz Children's Hospital, Miami. Gwenn E. McLaughlin, MD, MSPH.

**Florida:** Nicklaus Children's Hospital, Miami. Paula S. Espinal, MD, MPH.

**Georgia:** Children's Healthcare of Atlanta at Egleston, Atlanta. Keiko M. Tarquinio, MD.

**Illinois:** Ann & Robert H. Lurie Children's Hospital of Chicago, Chicago. Kelly N. Michelson, MD, MPH; Bria M. Coates, MD.

**Indiana:** Riley Hospital for Children, Indianapolis. Courtney M. Rowan, MD, MS.

**Iowa:** University of Iowa Stead Family Children's Hospital, Iowa City. Kari Wellnitz, MD; Guru Bhoojhwon MBBS, MD.

**Kentucky:** University of Louisville and Norton Children's Hospital, Louisville. Janice E. Sullivan, MD; Vicki L. Montgomery, MD; Kevin M. Havlin, MD.

**Louisiana:** Children's Hospital of New Orleans, New Orleans. Tamara T. Bradford, MD.

**Maryland:** Johns Hopkins Children's Hospital, Baltimore. Becky J. Riggs, MD; Melania M. Bembea, MD, MPH, PhD.

**Maryland:** University of Maryland Children's Hospital, Baltimore. Ana Lia Graciano, MD.

**Maryland:** Sinai Hospital of Baltimore, Baltimore. Susan V. Lipton, MD, MPH.

**Massachusetts:** Baystate Children's Hospital, Springfield. Kimberly L. Marohn, MD.

**Massachusetts:** Boston Children's Hospital, Boston. Adrienne G. Randolph, MD; Margaret M. Newhams, MPH; Audrey Dionne, MD; Jane W. Newburger, MD, MPH; Kevin G. Friedman, MD; Mary Beth F. Son, MD; Sabrina R. Chen; Cameron C. Young; Suden Kucukak, MD; Madyson FitzGerald; Julia Worden; Benjamin Boutselis.

**Massachusetts:** MassGeneral Hospital for Children, Boston. Ryan W. Carroll, MD, MPH; Phoebe H. Yager, MD; Neil D. Fernandes, MBBS.

**Michigan:** University of Michigan CS Mott Children's Hospital, Ann Arbor. Heidi R. Flori, MD, FAAP.

**Michigan:** Children's Hospital of Michigan, Detroit. Sabrina M. Heidemann, MD.

**Minnesota:** University of Minnesota Masonic Children's Hospital, Minneapolis. Janet R. Hume, MD, PhD.

**Minnesota:** Mayo Clinic, Rochester. Emily R. Levy, MD.

**Mississippi:** Children's Hospital of Mississippi, Jackson. Charlotte V. Hobbs, MD; Lora Martin MSN, FNP-C; Gurbaksh Singh, MSc; Urita Agana, BSc; Preeti Venula, MPH; Sarah McGraw MSN, FNP-C.

**Missouri:** Children's Mercy Hospital, Kansas City. Jennifer E. Schuster, MD.

**Missouri:** Washington University in St. Louis. Philip C. Spinella MD.

**Nebraska:** Children's Hospital & Medical Center, Omaha. Melissa L. Cullimore, MD, PhD; Russell J. McCulloh, MD.

**New Jersey:** Hackensack University Medical Center, Hackensack. Katharine N. Clouser, MD.

**New Jersey:** Newark Beth Israel Medical Center, Newark. Rowan F. Walsh, MD

**New Jersey:** St. Barnabas Medical Center, Livingston. Shira J. Gertz, MD.

**New Jersey:** Bristol-Myers Squibb Children's Hospital, New Brunswick. Lawrence C. Kleinman, MD, MPH, FAAP; Simon Li, MD, MPH; Steven M. Horwitz, MD.

**New York:** Golisano Children's Hospital, Rochester. Kate G. Ackerman, MD; Jill M. Cholette, MD, Joseph D. Kuebler MD MBA.

**New York:** Hassenfeld Children's Hospital at NYU Langone, New York. Adam J. Ratner, MD, MPH; Heda Dapul, MD; Vijaya L. Soma, MD.

**New York:** Kings County Hospital, Brooklyn. Michael A. Keenaghan, MD.

**New York:** Maria Fareri Children's Hospital, Valhalla. Aalok R. Singh, MD.

**New York:** The Mount Sinai Hospital, New York City. Sheemon P. Zackai, MD; Jennifer K. Gillen, MD.

**New York:** Stony Brook University Hospital, Stony Brook. Ilana Harwayne-Gidansky, MD; Saul R. Hymes, MD.

**New York:** SUNY Downstate Medical Center University Hospital, Brooklyn. Sule Doymaz, MD.

**North Carolina:** University of North Carolina at Chapel Hill, Chapel Hill. Stephanie P. Schwartz, MD; Tracie C. Walker, MD.

**Ohio:** Nationwide Children's Hospital, Columbus. Mark W. Hall MD, FCCM.

**Ohio:** University Hospitals Rainbow Babies and Children's Hospital, Cleveland. Steven L. Shein, MD; Amanda N. Lansell, MD.

**Ohio:** Akron Children's Hospital, Akron. Ryan A. Nofziger, MD.

**Ohio:** Cincinnati Children's Hospital, Cincinnati. Mary A. Staat, MD, MPH.

**Pennsylvania:** Children's Hospital of Philadelphia, Philadelphia. Julie C. Fitzgerald, MD, PhD, MSCE; Ryan Burnett, BS; Jenny L. Bush, RNC, BSN.

**Pennsylvania:** Penn State Children's Hospital, Hershey. Neal J. Thomas, MD, MSc.

**Pennsylvania:** St. Christopher's Hospital for Children, Philadelphia. Monica L. Koncicki, MD, Andrew D. Butler MD.

**Pennsylvania:** UPMC Children's Hospital of Pittsburgh. Ericka L. Fink, MD, MS; Joseph A. Carcillo, MD.

**South Carolina:** MUSC Children's Health, Charleston. Elizabeth H. Mack, MD, MS; Laura S. Smallcomb MD.

**Tennessee:** Monroe Carell Jr. Children's Hospital at Vanderbilt, Nashville. Natasha B. Halasa, MD, MPH.

**Tennessee:** Le Bonheur Children's Hospital, Memphis. Dai Kimura, MD.

**Texas:** Texas Children's Hospital, Houston. Laura L. Loftis, MD.

**Texas:** University of Texas Health Science Center, Houston. Alvaro Coronado Munoz, MD.

**Texas:** University of Texas Southwestern, Children's Medical Center Dallas, Dallas. Cindy Bowens, MD, MSCS; Mia Maamari, MD.

**Utah:** Primary Children's Hospital, Salt Lake City. Hillary Crandall, MD, PhD.

**Washington:** Seattle Children's Hospital, Seattle. Lincoln S. Smith, MD; John K. McGuire, MD.

**Wisconsin:** University of Wisconsin-Madison, Madison. Pelin Cengiz, MD.

**CDC COVID-19 Response Team on Overcoming COVID-19:** Manish M. Patel, MD, MPH; Leora R. Feldstein, PhD, MSc; Mark W. Tenforde, MD PhD; Ashley M. Jackson MPH; Laura D. Zambrano, PhD; Angela P. Campbell, MD.

## Data S1.

### Supplemental Methods

#### Case-Definition for Severe Acute COVID-19 <sup>a</sup>

- Admitted to the hospital intensive care unit or high-acuity stepdown unit with symptoms suspected to be related to COVID-19
- Evidence of infection with SARS-CoV-2 based on a positive RT-PCR test result during current illness
- Severe organ system involvement including at least 1 of the following:
  - **Respiratory**
    - Receipt of mechanical ventilation or any type of supplemental oxygen (or increased support for patients receiving respiratory support at baseline)
    - Severe bronchospasm requiring continuous bronchodilators
    - Pulmonary infiltrates on chest radiograph
    - Lower respiratory infection
    - Pleural effusion
    - Pneumothorax or other signs of barotrauma
    - Pulmonary hemorrhage
    - Chest tube or drainage required
  - **Cardiovascular**
    - Cardiac dysrhythmia or arrhythmia
    - Ejection fraction <55%
    - Pulmonary edema due to left heart failure
    - Coronary artery aneurysm (LAD or RCA z score  $\geq 2.5$ )
    - B-type natriuretic peptide  $\geq 1000$  pg/mL
    - Elevated troponin-based on the upper limit of normal for the site laboratory
    - Receipt of vasopressor or vasoactive support
    - Receipt of cardiopulmonary resuscitation or ECMO support
  - **Kidney**

- Receipt of dialysis (for patients without chronic kidney failure)
- Acute kidney injury<sup>b</sup> (in patients without prior kidney disease)
- **Neurologic**
  - Stroke or acute intracranial hemorrhage
  - Seizures
  - Coma
  - Encephalitis, aseptic meningitis, or demyelinating disorder (eg, acute disseminated encephalomyelitis) diagnosed by a neurologist
  - Decreased hearing or vision
  - Iritis or uveitis
- **Gastrointestinal**
  - Appendicitis
  - Pancreatitis
  - Hepatitis or hepatomegaly
  - Gallbladder hydrops or edema
  - Other complications as determined by site clinicians included ileitis, colitis, or mesenteric adenitis
- **Hematologic**
  - Absolute lymphocyte count  $<1 \times 10^3$  cells/ $\mu$ L
  - Absolute neutrophil count  $<0.5 \times 10^3$  cells/ $\mu$ L excluding chemotherapy patients<sup>3</sup>
  - Severe anemia<sup>c</sup>
  - Platelet count  $<50\,000/\mu$ L
  - Deep vein thrombosis
  - Pulmonary embolism
  - Hemolysis
  - Bleeding
  - Ischemia of an extremity
  - Other complications as determined by site clinicians included hemolytic uremic syndrome, anemia requiring transfusion, and pancytopenia

Abbreviations: COVID-19, coronavirus disease 2019; ECMO, extracorporeal membrane oxygenation; LAD, left anterior descending; MIS-C, multisystem inflammatory syndrome in children; RCA, right coronary artery; RT-PCR, reverse transcriptase–polymerase chain reaction; SARS-CoV-2, severe acute respiratory syndrome coronavirus 2.

<sup>a</sup> Case definition was created by clinical consensus among the Overcoming COVID-19 steering committee principal investigators.

<sup>b</sup> Acute kidney injury was defined as a creatinine level equal to or above the following values by age: less than 4 weeks: 1.59 mg/dL; 4 weeks to less than 1 year: 0.62 mg/dL; 1 to 10 years: 1.13 mg/dL; and  $\geq 11$  years:  $>1.59$  mg/dL.

<sup>c</sup> Severe anemia was defined as hemoglobin level less than 7 g/dL among children younger than 59 months of age, otherwise hemoglobin level less than 8 g/dL.

## Centers for Disease Control and Prevention Case-Definition for MIS-C<sup>a</sup>

---

- Age <21 y
- Fever  $\geq 38.0$  °C for  $\geq 24$  h or report of subjective fever lasting  $\geq 24$  h
- Laboratory evidence of inflammation<sup>b</sup>
- Evidence of clinically severe illness requiring hospitalization with multisystem ( $\geq 2$ ) organ involvement (cardiac, kidney, respiratory, hematologic, gastrointestinal, dermatologic, or neurological)
- No alternative plausible diagnoses
- Positive for current or recent SARS-CoV-2 infection by RT-PCR, antibody, or antigen test; or exposure to a suspected or confirmed COVID-19 case within the 4 wk prior to the onset of symptoms<sup>c</sup>

Abbreviations: COVID-19, coronavirus disease 2019; MIS-C, multisystem inflammatory syndrome in children; RT-PCR, reverse transcriptase–polymerase chain reaction; SARS-CoV-2, severe acute respiratory syndrome coronavirus 2.

<sup>a</sup> Must meet all criteria after adjudication by site and coordinating center principal investigators.

<sup>b</sup> Including, but not limited to, 1 or more of the following: an elevated C-reactive protein, erythrocyte sedimentation rate, fibrinogen, procalcitonin, D-dimer, ferritin, lactate dehydrogenase, interleukin 6, elevated neutrophils, reduced lymphocytes, and low albumin level.

<sup>c</sup> Patients without a positive SARS-CoV-2 test result were excluded after May 31, 2020, when site RT-PCR and antibody testing was more available.



## Arrhythmia Case Report Form

Dear Overcoming COVID-19 Investigators,

You have identified \_\_\_\_\_ as having an arrhythmia during hospitalization for COVID-19 / MIS-C. We are working on the spectrum of tachyarrhythmias in this disease and hoping you can provide us with additional information on the arrhythmia.

1. Please confirm all observed tachyarrhythmia during hospitalization (please select all that apply).
  - a.  Supraventricular tachycardia (narrow- or usual-complex tachycardia more than 3 beats with  $\geq 1:1$  atrial-ventricular association)  
Please specify type if known
    1.  Atrial fibrillation
    2.  Atrial flutter
    3.  Ectopic atrial tachycardia
    4.  Reentrant supraventricular tachycardia
  - b.  Accelerated junctional rhythm / Junctional ectopic tachycardia (narrow- or usual- complex tachycardia with  $\geq 1:1$  ventricular-atrial association and rates  $> 100$  bpm)
  - c.  Non-sustained ventricular tachycardia (3 consecutive ventricular beats at a rate of 120 bpm and  $< 30$  seconds duration)
  - d.  Sustained ventricular tachycardia ( $> 30$  seconds or requiring intervention for termination)
  - e.  Ventricular fibrillation
2. Where did the diagnosis of arrhythmia come from (select all that apply)?
  - a.  Non-cardiac ICU progress note
  - b.  Cardiac ICU progress note
  - c.  Non-cardiology inpatient progress note
  - d.  Cardiology inpatient progress note
  - e.  Cardiology consultation
  - f.  12-lead ECG
3. What date was an arrhythmia first observed?  
Date:
4. What date was an arrhythmia last observed?  
Date:
5. Were any interventions required for treatment of tachyarrhythmias (please select all that apply)?
  - a)  No treatment
  - b)  Antiarrhythmic medication  
If yes, please specify:  
Medication:  
Route administration (oral vs IV):  
Dose:

- c)  DC cardioversion
- d)  CPR
- e)  ECMO

6. Was the patient discharged home on antiarrhythmic medication?

- a)  Yes

If yes, please specify:

Medication:

Dose:

- b)  No

**Please provide any available de-identified ECG or rhythm strips either embedded within this document or as an additional attachment to the email response.**

Thank you

**Table S1:** Characteristics of patients hospitalized with acute COVID-19 and MIS-C with a reported tachyarrhythmia in 63 U.S. hospitals participating in the ‘Overcoming COVID-19’ public health registry, March 15—December 31, 2021.

|                                                        | <b>MIS-C<br/>(n=41)</b> | <b>Acute COVID-19<br/>(n=22)</b> | <b>P value</b> |
|--------------------------------------------------------|-------------------------|----------------------------------|----------------|
| <b>Age (years)</b>                                     | 14.5 [10.2, 16.9]       | 16.6 [11.2, 18.2]                | 0.18           |
| <b>Male Sex</b>                                        | 26 (63)                 | 13 (59)                          | 0.95           |
| <b>At least one underlying condition</b>               | 18 (44)                 | 18 (82)                          | 0.007          |
| <b>Cardiovascular</b>                                  | 1 (2)                   | 5 (23)                           | 0.02           |
| <b>Congenital Heart Disease</b>                        | 1 (2)                   | 3 (14)                           | 0.12           |
| <b>Cardiomyopathy</b>                                  | 0 (0)                   | 2 (9)                            | 0.12           |
| <b>Arrhythmia</b>                                      | 0 (0)                   | 2 (9)                            | 0.12           |
| <b>Acquired Heart Disease</b>                          | 0 (0)                   | 0 (0)                            | 1.00           |
| <b>Other</b>                                           | 0 (0)                   | 0 (0)                            | 1.00           |
| <b>Obesity</b>                                         | 23/41 (56)              | 12/19 (63)                       | 0.82           |
| <b>Presentation Conditions</b>                         |                         |                                  |                |
| <b>Duration of Symptoms Pre-Hospitalization (days)</b> | 4 [3, 6]                | 3 [1, 4.5]                       | 0.048          |
| <b>Organ systems involved</b>                          | 5 [5, 6]                | 4 [2.25, 5]                      | 0.001          |
| <b>Initial Laboratory Values</b>                       |                         |                                  |                |
| <b>Neutrophil to Lymphocyte Ratio</b>                  | 12.17 [5.74, 17.82]     | 5.90 [2.77, 12.57]               | 0.02           |
| <b>ALT (U/L)</b>                                       | 60.5 [36.0, 90.5]       | 28.5 [18.0, 79.0]                | 0.06           |
| <b>CRP (mg/dL)</b>                                     | 18.0 [13.4, 28.7]       | 1.1 [0.7, 2.7]                   | <0.001         |
| <b>Troponin (ng/mL), median [Q1,Q3]</b>                | 0.50 [0.11, 6.75]       | 0.08 [0.02, 0.56]                | 0.77           |
| <b>Cardiac Complications</b>                           |                         |                                  |                |
| <b>Cardiovascular Involvement*</b>                     | 38 (93)                 | 13 (59)                          | 0.002          |
| <b>BNP or NT-proBNP &gt;1,000 pg/mL</b>                | 29/31 (94)              | 4/9 (44)                         | 0.003          |
| <b>Elevated Troponin</b>                               | 33/38 (87)              | 9/13 (69)                        | 0.21           |
| <b>Echocardiogram performed</b>                        | 41 (100)                | 21 (95)                          | 0.35           |
| <b>Normal ventricular systolic function</b>            | 9 (22)                  | 11 (52)                          | 0.03           |
| <b>Mild-moderate ventricular dysfunction</b>           | 18 (44)                 | 4 (19)                           | 0.09           |
| <b>Severe ventricular dysfunction</b>                  | 13 (32)                 | 6 (29)                           | 1.00           |
| <b>Unknown ventricular function</b>                    | 1 (2)                   | 0                                | 1.00           |
| <b>CAA (RCA or LAD z-score ≥ 2.5)</b>                  | 15 (37)                 | 0                                | 0.001          |
| <b>Pericarditis or Pericardial Effusion</b>            | 18 (44)                 | 7 (33)                           | 0.560          |
| <b>Critical Care Interventions</b>                     |                         |                                  |                |

|                                                      |            |               |       |
|------------------------------------------------------|------------|---------------|-------|
| <b>Any respiratory support</b>                       | 35 (85)    | 16 (73)       | 0.38  |
| <b>Invasive Mechanical Ventilation</b>               | 22 (54)    | 11 (50)       | 0.99  |
| <b>Non-Invasive Mechanical Ventilation Only</b>      | 5 (12)     | 3 (14)        | 1.00  |
| <b>Vasopressor Requirement</b>                       | 38 (93)    | 14 (64)       | 0.01  |
| <b>ECMO†</b>                                         | 7 (17)     | 8 (36)        | 0.16  |
| <b>Severity Scores 1<sup>st</sup> 24 Hours</b>       |            |               |       |
| <b>pSOFA, median [Q1,Q3]</b>                         | 4 (3, 7)   | 3.5 (1, 4.75) | 0.04  |
| <b>Outcomes</b>                                      |            |               |       |
| <b>ICU Admission</b>                                 | 40 (98)    | 21 (95)       | 1.00  |
| <b>ICU Length of Stay, median [Q1,Q3], days</b>      | 8 [5, 12]  | 18 [6, 28]    | 0.04  |
| <b>Hospital Length of Stay, median [Q1,Q3], days</b> | 12 [9, 18] | 8 [5, 37]     | 0.73  |
| <b>Death</b>                                         | 2 (5)      | 7 (32)        | 0.006 |

n (%) or median [Q1,Q3]

\* defined as BNP  $\geq$ 1,000 pg/mL, elevated troponin, systolic ventricular dysfunction or coronary artery aneurysm

†Includes ECMO (veno-venous and veno-arterial) at any point during hospitalization, irrespective of indication

ALT: alanine transaminase, CRP: C-reactive protein, BNP: B-type natriuretic peptide, CAA: coronary artery aneurysm, RCA: right coronary artery, LAD: left anterior descending coronary artery, ECMO: extracorporeal membrane oxygenation, ICU: intensive care unit, MIS-C: multisystem inflammatory syndrome in children. NT-proBNP: N-terminal pro B-type natriuretic peptide, pSOFA: pediatric sequential organ failure assessment

**Table S2:** Characteristics of patients hospitalized with acute COVID-19 and MIS-C and ventricular tachycardia in 63 U.S. hospitals participating in the ‘Overcoming COVID-19’ public health registry, March 15—December 31, 2021.

|                                                        | <b>Sustained VT<br/>(n=13)</b> | <b>Non-sustained VT<br/>(n=25)</b> |
|--------------------------------------------------------|--------------------------------|------------------------------------|
| <b>Age (years)</b>                                     | 14.3 [6.9, 15.7]               | 15.6 [9.1, 17.4]                   |
| <b>Male Sex</b>                                        | 6 (46)                         | 15 (60)                            |
| <b>MIS-C diagnosis</b>                                 | 7 (54)                         | 20 (80)                            |
| <b>Underlying Conditions</b>                           |                                |                                    |
| <b>At least one underlying condition</b>               | 8 (62)                         | 9 (16)                             |
| <b>Cardiovascular</b>                                  | 2 (15)                         | 2 (8)                              |
| <b>Obesity</b>                                         | 8/12 (67)                      | 14/25 (56)                         |
| <b>Presentation Conditions</b>                         |                                |                                    |
| <b>Duration of Symptoms Pre-Hospitalization (days)</b> | 4 [3, 5]                       | 4 [2, 6]                           |
| <b>Number Organ Systems Involved</b>                   | 6 [4, 6]                       | 5 [5, 6]                           |
| <b>Initial Laboratory Values</b>                       |                                |                                    |
| <b>Neutrophil to Lymphocyte Ratio</b>                  | 6.95 [5.07, 14.5]              | 12.25 [5.72, 15.93]                |
| <b>ALT (U/L)</b>                                       | 49 [28.32, 92.75]              | 48 [24.5, 71.5]                    |
| <b>CRP (mg/dL)</b>                                     | 26.4 [7.63, 44.38]             | 17.33 [8.77, 29.23]                |
| <b>Troponin (ng/mL), median [Q1,Q3]</b>                | 2.66 [0.73, 4.58]              | 0.78 [0.1, 13]                     |
| <b>Cardiac Complications</b>                           |                                |                                    |
| <b>Cardiovascular Involvement *</b>                    | 12 (92)                        | 21 (84)                            |
| <b>BNP or NT-proBNP &gt;1,000 pg/mL</b>                | 6/6 (100)                      | 16/17 (94)                         |
| <b>Elevated Troponin</b>                               | 9/10 (90)                      | 18 (86)                            |
| <b>Echocardiogram performed</b>                        | 13 (100)                       | 24 (96)                            |
| <b>Normal ventricular systolic function</b>            | 3 (23)                         | 9 (38)                             |
| <b>Mild-moderate ventricular dysfunction</b>           | 4 (31)                         | 10 (42)                            |
| <b>Severe ventricular dysfunction</b>                  | 6 (46)                         | 5 (21)                             |
| <b>CAA (RCA or LAD z-score ≥ 2.5)</b>                  | 3 (23)                         | 6 (25)                             |
| <b>Pericarditis or Pericardial Effusion</b>            | 4 (31)                         | 11 (46)                            |
| <b>Critical Care Interventions</b>                     |                                |                                    |
| <b>Any respiratory support</b>                         | 12 (92)                        | 20 (80)                            |
| <b>Invasive Mechanical Ventilation</b>                 | 11 (85)                        | 12 (48)                            |

|                                                      |              |            |
|------------------------------------------------------|--------------|------------|
| <b>Non-Invasive Mechanical Ventilation Only</b>      | 0 (0)        | 3 (12)     |
| <b>Vasopressor Requirement</b>                       | 13 (100)     | 22 (88)    |
| <b>ECMO †</b>                                        | 7 (54)       | 5 (20)     |
| <b>Severity Scores 1<sup>st</sup> 24 Hours</b>       |              |            |
| <b>pSOFA, median [Q1,Q3]</b>                         | 3 [2, 5]     | 3 [1, 5]   |
| <b>Outcomes</b>                                      |              |            |
| <b>ICU Admission</b>                                 | 13 (100)     | 25 (100)   |
| <b>ICU Length of Stay, median [Q1,Q3], days</b>      | 16 [7, 28]   | 9 [6, 12]  |
| <b>Hospital Length of Stay, median [Q1,Q3], days</b> | 19 [14 , 75] | 12 [9, 19] |
| <b>Death</b>                                         | 6 (46)       | 2 (8)      |

n (%) or median [Q1,Q3]

\* defined as BNP  $\geq$ 1,000 pg/mL, elevated troponin, systolic ventricular dysfunction or coronary artery aneurysm

† Includes ECMO (veno-venous and veno-arterial) at any point during hospitalization, irrespective of indication

ALT: alanine transaminase, CRP: C-reactive protein, BNP: B-type natriuretic peptide, CAA: coronary artery aneurysm, RCA: right coronary artery, LAD: left anterior descending coronary artery, ECMO: extracorporeal membrane oxygenation, ICU: intensive care unit, MIS-C: multisystem inflammatory syndrome in children. NT-proBNP: N-terminal pro B-type natriuretic peptide, pSOFA: pediatric sequential organ failure assessment

**Table S3:** Characteristics of patients with adjudicated and not-adjudicated tachyarrhythmia in 63 U.S. hospitals participating in the ‘Overcoming COVID-19’ public health registry, March 15—December 31, 2021.

|                                          | <b>Adjudicated<br/>Arrhythmia<br/>(n=23)</b> | <b>No available<br/>tracing for review<br/>(n=40)</b> | <b>P-<br/>value</b> |
|------------------------------------------|----------------------------------------------|-------------------------------------------------------|---------------------|
| Age (years)                              | 15.68 [10.74,<br>17.22]                      | 15.1 [9.9, 17.51]                                     | 0.92                |
| Male sex                                 | 15 (65)                                      | 24 (60)                                               | 0.89                |
| MIS-C diagnosis                          | 14 (61)                                      | 27 (68)                                               | 0.80                |
| <b>Arrhythmia</b>                        |                                              |                                                       |                     |
| SVT                                      | 12 (52)                                      | 16 (40)                                               | 0.50                |
| Accelerated junctional rhythm            | 6 (26)                                       | 3 (8)                                                 | 0.06                |
| Ventricular tachycardia                  | 11 (48)                                      | 27 (68)                                               | 0.20                |
| <b>Cardiovascular involvement</b>        |                                              |                                                       |                     |
| Cardiovascular involvement*              | 18 (23)                                      | 33 (83)                                               | 0.94                |
| BNP or NT-proBNP >1,000 pg/mL            | 13/16                                        | 20/24                                                 | 1.00                |
| Elevated troponin                        | 14/18                                        | 28/33                                                 | 0.70                |
| Echocardiogram performed                 | 23 (100)                                     | 39 (98)                                               | 1.00                |
| Normal ventricular systolic function     | 7 (30)                                       | 13 (33)                                               |                     |
| Mild-moderate ventricular dysfunction    | 8 (35)                                       | 14 (36)                                               | 0.93                |
| Severe ventricular dysfunction           | 8 (35)                                       | 11 (28)                                               |                     |
| Unknown                                  | 0                                            | 1 (3)                                                 |                     |
| CAA (RCA or LAD s-score $\geq$ 2.5)      | 5 (22)                                       | 10 (26)                                               | 0.97                |
| Pericarditis or Pericardial Effusion     | 4 (17)                                       | 21 (54)                                               | 0.007               |
| <b>Arrhythmia intervention</b>           |                                              |                                                       |                     |
| None                                     | 8 (35)                                       | 18 (45)                                               | 0.60                |
| Antiarrhythmic medication                | 15 (65)                                      | 16 (40)                                               | 0.10                |
| Electrical cardioversion                 | 6 (26)                                       | 5 (13)                                                | 0.31                |
| CPR                                      | 4 (17)                                       | 4 (10)                                                | 0.45                |
| ECMO for arrhythmia                      | 5 (22)                                       | 4 (10)                                                | 0.27                |
| <b>Critical Care Interventions</b>       |                                              |                                                       |                     |
| Any respiratory support                  | 18 (73)                                      | 33 (83)                                               | 0.94                |
| Invasive mechanical ventilation          | 13 (57)                                      | 20 (50)                                               | 0.81                |
| Non-invasive mechanical ventilation only | 4 (17)                                       | 4 (10)                                                | 0.45                |
| Vasopressor Requirement                  | 19 (83)                                      | 33 (83)                                               | 1.00                |
| ECMO†                                    | 6 (26)                                       | 9 (23)                                                | 0.99                |
| <b>Outcomes</b>                          |                                              |                                                       |                     |

|                                               |              |               |      |
|-----------------------------------------------|--------------|---------------|------|
| ICU length of stay, median [Q1,Q3], days      | 7 [5, 10.75] | 9 [5.5, 17.5] | 0.30 |
| Hospital Length of Stay, median [Q1,Q3], days | 12 [6, 16]   | 10 [8, 19]    | 0.56 |
| Death                                         | 4 (17)       | 5 (13)        | 0.71 |

n (%) or median [Q1,Q3]

\* defined as BNP  $\geq$ 1,000 pg/mL, elevated troponin, systolic ventricular dysfunction or coronary artery aneurysm

†Includes ECMO (veno-venous and veno-arterial) at any point during hospitalization, irrespective of indication

BNP: B-type natriuretic peptide, CAA: coronary artery aneurysm, RCA: right coronary artery, LAD: left anterior descending coronary artery, ECMO: extracorporeal membrane oxygenation, ICU: intensive care unit, MIS-C: multisystem inflammatory syndrome in children, NT-proBNP: N-terminal pro B-type natriuretic peptide, pSOFA: pediatric sequential organ failure assessment, SVT: supraventricular tachycardia



**Table S4:** ECG findings in patients with tachyarrhythmias hospitalized with MIS-C and acute COVID-19 in 63 U.S. hospitals participating in the ‘Overcoming COVID-19’ public health registry, March 15—December 31, 2021.

|                                                     | All patients (n=22) | SVT (n=10) | Accelerated junctional rhythm (n=2) | Ventricular tachycardia (n=15) | Underlying cardiac disease (n=3) |
|-----------------------------------------------------|---------------------|------------|-------------------------------------|--------------------------------|----------------------------------|
| <b>ST segment changes</b>                           | 15 (68)             | 10 (100)   | 1 (50)                              | 8 (53)                         | 2 (67)                           |
| ST segment elevation                                | 2 (9)               | 0 (0)      | 1 (50)                              | 2 (13)                         | 0 (0)                            |
| ST segment depression                               | 1 (5)               | 1 (10)     | 0 (0)                               | 1 (7)                          | 1 (33)                           |
| T-wave inversion                                    | 5 (23)              | 3 (30)     | 0 (0)                               | 2 (13)                         | 0 (0)                            |
| Non-specific                                        | 7 (32)              | 6 (60)     | 0 (0)                               | 3 (20)                         | 1 (33)                           |
| <b>Prolonged QTc interval</b>                       | 8 (36)              | 3 (30)     | 1 (50)                              | 5 (33)                         | 2 (67)                           |
| <b>Right bundle branch block</b>                    | 3 (14)              | 0 (0)      | 1 (50)                              | 2 (20)                         | 1 (33)                           |
| <b>Incomplete right bundle branch block</b>         | 3 (14)              | 3 (30)     | 0 (0)                               | 1 (7)                          | 0 (0)                            |
| <b>Axis deviation</b>                               |                     |            |                                     |                                |                                  |
| Right axis                                          | 2 (9)               | 1 (10)     | 0 (0)                               | 1 (7)                          | 0 (0)                            |
| Left axis                                           | 2 (9)               | 1 (10)     | 0 (0)                               | 1 (7)                          | 1 (33)                           |
| <b>Ventricular hypertrophy</b>                      |                     |            |                                     |                                |                                  |
| Right                                               | 2 (9)               | 1 (10)     | 1 (50)                              | 1 (7)                          | 1 (33)                           |
| Left                                                | 1 (5)               | 0 (0)      | 0 (0)                               | 1 (7)                          | 1 (33)                           |
| <b>Atrial enlargement</b>                           | 1 (5)               | 0 (0)      | 0 (0)                               | 1 (7)                          | 1 (33)                           |
| <b>1<sup>st</sup> degree atrioventricular block</b> | 1 (5)               | 0 (0)      | 0 (0)                               | 1 (7)                          | 0 (0)                            |
| <b>Premature atrial beat</b>                        | 1 (5)               | 1 (10)     | 0 (0)                               | 0 (0)                          | 0 (0)                            |

n (%)

SVT: supraventricular tachycardia

**Table S5:** Characteristics of patients treated and not treated for tachyarrhythmia in 63 U.S. hospitals participating in the ‘Overcoming COVID-19’ public health registry, March 15—December 31, 2021.

|                                                 | <b>Intervention for tachyarrhythmia (n=37)</b> | <b>No intervention for tachyarrhythmia (n=26)</b> | <b>P value</b> |
|-------------------------------------------------|------------------------------------------------|---------------------------------------------------|----------------|
| <b>Age (years)</b>                              | 15.62 [10.62, 17.63]                           | 14.74 [10.6, 16.79]                               | 0.64           |
| <b>Male Sex</b>                                 | 21 (57)                                        | 18 (69)                                           | 0.46           |
| <b>Underlying Conditions</b>                    |                                                |                                                   |                |
| <b>At least one underlying condition</b>        | 22 (59)                                        | 14 (54)                                           | 0.85           |
| <b>Cardiovascular</b>                           | 5 (14)                                         | 1 (4)                                             | 0.39           |
| <b>Cardiac Complications</b>                    |                                                |                                                   |                |
| <b>Cardiovascular Involvement *</b>             | 28 (76)                                        | 23 (88)                                           | 0.33           |
| <b>BNP or NT-proBNP &gt;1,000 pg/mL</b>         | 19/20 (95)                                     | 14/20 (70)                                        | 0.09           |
| <b>Elevated Troponin</b>                        | 23/30 (77)                                     | 19/21 (90)                                        | 0.28           |
| <b>Echocardiogram performed</b>                 | 37 (100)                                       | 25 (96)                                           | 0.41           |
| <b>Normal ventricular systolic function</b>     | 14 (38)                                        | 6 (24)                                            |                |
| <b>Mild-moderate ventricular dysfunction</b>    | 11 (30)                                        | 11 (44)                                           | 0.49           |
| <b>Severe ventricular dysfunction</b>           | 11 (30)                                        | 8 (32)                                            |                |
| <b>Unknown ventricular function</b>             | 1 (3)                                          | 0 (0)                                             |                |
| <b>CAA (RCA or LAD z-score ≥ 2.5)</b>           | 10 (27)                                        | 5 (20)                                            | 0.74           |
| <b>Pericarditis or Pericardial Effusion</b>     | 11 (30)                                        | 14 (56)                                           | 0.07           |
| <b>Critical Care Interventions</b>              |                                                |                                                   |                |
| <b>Any respiratory support</b>                  | 30 (81)                                        | 21 (81)                                           | 1.00           |
| <b>Invasive Mechanical Ventilation</b>          | 23 (62)                                        | 10 (38)                                           | 0.11           |
| <b>Non-Invasive Mechanical Ventilation Only</b> | 2 (5)                                          | 6 (23)                                            | 0.06           |
| <b>Vasopressor Requirement</b>                  | 30 (81)                                        | 22 (85)                                           | 1.00           |
| <b>ECMO†</b>                                    | 12 (32)                                        | 3 (12)                                            | 0.07           |
| <b>Severity Scores 1<sup>st</sup> 24 Hours</b>  |                                                |                                                   |                |
| <b>pSOFA, median [Q1,Q3]</b>                    | 4 [2, 6]                                       | 4 [2.25, 5.75]                                    | 0.78           |
| <b>Outcomes</b>                                 |                                                |                                                   |                |
| <b>ICU Admission</b>                            | 37 (100)                                       | 24 (92)                                           | 0.17           |

|                                                      |            |                |      |
|------------------------------------------------------|------------|----------------|------|
| <b>ICU Length of Stay, median [Q1,Q3], days</b>      | 11 [5, 20] | 7.5 [5, 10.25] | 0.23 |
| <b>Hospital Length of Stay, median [Q1,Q3], days</b> | 15 [7, 22] | 10 [8, 15]     | 0.42 |
| <b>Death</b>                                         | 8 (22)     | 1 (4)          | 0.07 |

n (%) or median [Q1,Q3]

\* defined as BNP  $\geq$ 1,000 pg/mL, elevated troponin, systolic ventricular dysfunction or coronary artery aneurysm

<sup>a</sup>Includes ECMO (veno-venous and veno-arterial) at any point during hospitalization, irrespective of indication

BNP: B-type natriuretic peptide, CAA: coronary artery aneurysm, RCA: right coronary artery, LAD: left anterior descending coronary artery, ECMO: extracorporeal membrane oxygenation, ICU: intensive care unit, MIS-C: multisystem inflammatory syndrome in children, NT-proBNP: N-terminal pro B-type natriuretic peptide, pSOFA: pediatric sequential organ failure assessment

**Table S6:** Clinical characteristics of patients with tachyarrhythmias who died during hospitalization in 63 U.S. hospitals participating in the ‘Overcoming COVID-19’ public health registry, March 15—December 31, 2021.

| Patient | Age    | MIS-C | Organ systems involved                                                           | Ventricular dysfunction | Tachyarrhythmia                                                                                                            | ECMO | Cause of death      |
|---------|--------|-------|----------------------------------------------------------------------------------|-------------------------|----------------------------------------------------------------------------------------------------------------------------|------|---------------------|
| 1       | 18–<21 | No    | Respiratory<br>Cardiac<br>Neurologic<br>Hematologic                              | Mild                    | Supraventricular tachycardia (atrial flutter)                                                                              | No   | Primary respiratory |
| 2       | <1     | No    | Respiratory<br>Cardiac<br>Neurologic<br>Hematologic                              | Severe                  | Supraventricular tachycardia (ectopic atrial tachycardia), Sustained ventricular tachycardia, and ventricular fibrillation | Yes  | Primary respiratory |
| 3       | 13–<18 | Yes   | Respiratory<br>Cardiac<br>Neurologic<br>Gastrointestinal<br>Hematologic<br>Renal | None                    | Accelerated junctional rhythm, Non-sustained ventricular tachycardia, and Ventricular fibrillation                         | Yes  | Primary cardiac     |
| 4       | 18–<21 | No    | Respiratory<br>Cardiac<br>Neurologic<br>Gastrointestinal<br>Hematologic<br>Renal | None                    | Non-sustained ventricular tachycardia                                                                                      | Yes  | Multiorgan failure  |
| 5       | 13–<18 | No    | Respiratory<br>Cardiac<br>Neurologic<br>Hematologic<br>Renal                     | ECHO Not Performed      | Non-sustained ventricular tachycardia                                                                                      | No   | Multiorgan failure  |
| 6       | 18–<21 | No    | Respiratory<br>Cardiac<br>Neurologic<br>Gastrointestinal<br>Hematologic<br>Renal | Severe                  | Non-sustained ventricular tachycardia, Sustained ventricular tachycardia, and ventricular fibrillation                     | Yes  | Multiorgan failure  |
| 7       | 6–<13  | No    | Respiratory<br>Cardiac<br>Renal                                                  | Severe                  | Sustained ventricular tachycardia                                                                                          | No   | Primary cardiac     |
| 8       | 13–<18 | Yes   | Respiratory<br>Cardiac<br>Neurologic                                             | None                    | Sustained ventricular tachycardia and ventricular fibrillation                                                             | No   | Multiorgan failure  |

---

|   |        |    |                                                                                  |      |                          |     |                    |
|---|--------|----|----------------------------------------------------------------------------------|------|--------------------------|-----|--------------------|
| 9 | 13-<18 | No | Respiratory<br>Cardiac<br>Neurologic<br>Gastrointestinal<br>Hematologic<br>Renal | Mild | Ventricular fibrillation | Yes | Multiorgan failure |
|---|--------|----|----------------------------------------------------------------------------------|------|--------------------------|-----|--------------------|

---

MIS-C: multisystem inflammatory syndrome in children
